# Supplementary material for: A high docosahexaenoic acid diet alters lung inflammation and recovery following repetitive exposure to aqueous organic dust extracts
Source: PubMed Central journal article supplement — J Nutr Biochem. Author manuscript; Available in PMC 2022 Jan 4. (PMC8725620; doi:10.1016/j.jnutbio.2021.108797), 2021-06-12
Supplement: NIHMS1762759-supplement-supplementary_materials.pdf [file NIHMS1762759-supplement-supplementary_materials.pdf]

## SUPPLEMENTARY MATERIALS

### **A high docosahexaenoic acid diet alters lung inflammation and recovery following repetitive exposure to aqueous organic dust extracts**

Arzu Ulu<sup>a,1</sup> and Abigail Burr<sup>a,1</sup>, Art J. Heires<sup>b</sup>, Jacqueline Pavlik<sup>b</sup>, Tricia Larsen<sup>c</sup>, Pedro A. Perez<sup>a</sup>, Carissa Bravo<sup>a</sup>, Nicholas V. DiPatrizio<sup>a</sup>, Michelle Baack<sup>c,d</sup>, Debra J. Romberger<sup>e,b</sup>, Tara M. Nordgren<sup>a,b,\*</sup>

<sup>a</sup> Division of Biomedical Sciences, School of Medicine, University of California, Riverside, Riverside, CA 92521.

<sup>b</sup> Pulmonary, Critical Care, Sleep and Allergy Division, University of Nebraska Medical Center, Omaha, NE 68198, USA.

<sup>c</sup> Children's Health Research Center, Sanford Research, Sioux Falls, SD 57104, USA.

<sup>d</sup> Division of Neonatology, University of South Dakota—Sanford School of Medicine, Sioux Falls, SD 57104, USA.

<sup>e</sup> VA Nebraska-Western Iowa Healthcare System, Omaha, NE 68105, USA.

<sup>1</sup>Equally contributing first authors.

- 1) Supplementary Figures (Suppl. Fig. 1-3)**
- 2) Supplementary Tables (Table S1-3)**
- 3) Certificate of analysis for DHASCO showing fatty acid analysis.**
- 4) Data sheets for Envigo control and high DHA diet showing detailed fatty acid analysis.**

## 1) Supplementary Figures

**Supplementary Figure 1. Plot profile of Ym1-positive cells in the lung following high DHA diet and repetitive HDE exposure at 3 weeks (A) and after the recovery period (B).** As described in the Materials and methods section, Plot Profile' function (<https://imagej.nih.gov/ij/docs/menus/analyze.html#plot>) was used on the whole images after a background subtraction using rolling ball radius parameter (50 pixels) for each image.

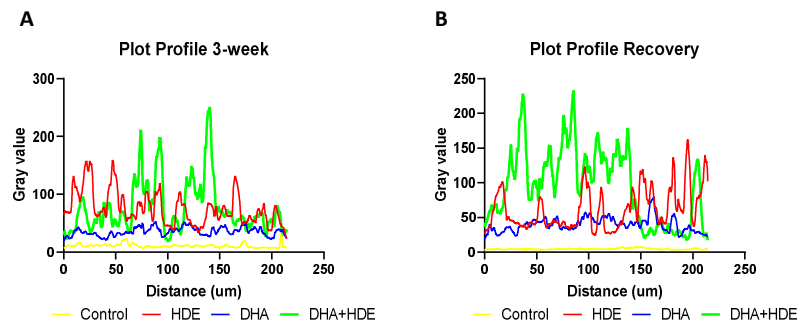

**Supplementary Figure 2. 'No primary antibody' controls for Arg-1 and GSL immunofluorescence staining in lung sections.**

Tissue sections with the most Arg-1 immunofluorescence staining were chosen to show the influence of secondary antibody on the overall staining. Secondary antibodies used include goat anti-rabbit IgG (H+L), Alexa Fluor 488 (Thermo Fisher Scientific, # A-11008, 1:500 dilution) or Streptavidin Cy 5 (Vector Laboratories, # SA-1500-1, 1:500 dilution) for Arg-1 and GSL, respectively.

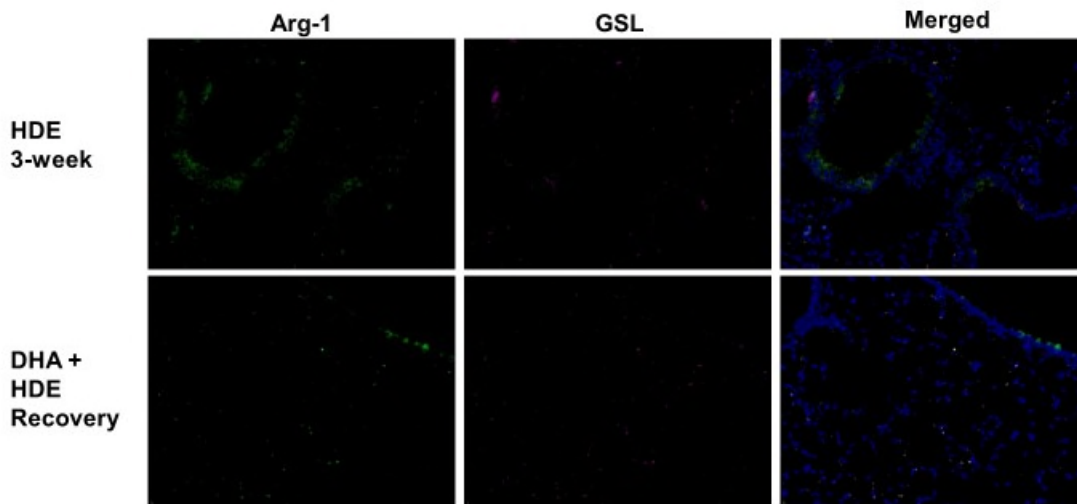

### Supplementary Figure 3. Effects of DHA and HDE on M1/M2 polarization of bone marrow derived macrophages.

Bone marrow derived macrophages (BMDM) were isolated from C57BL/6J male mouse and were differentiated for 7 days in the presence of 30% L929 medium containing M-CSF. At the end of the 7 days, cells were replated into 60 mm petri dishes at  $0.96 \times 10^6$  confluency. Before addition of M1/ M2 activators, cells were pretreated with DHA at  $1 \mu\text{M}$  final concentration for 1 hour at  $37^\circ\text{C}$ . Following 1-hour pre-treatment with DHA, cells were stimulated with LPS (100 ng/ml)/ IFN $\gamma$  (20 ng/ml) and IL-4 (20 ng/ml) to obtain M1 and M2 macrophages in the presence or absence of 0.5% HDE (prepared in 1X PBS). After 24 (**Suppl. Fig. 3A**) or 72 hours (**Suppl. Fig. 3B**), cells were detached by incubating the cells with the detachment buffer (10 mM glucose, 3 mM EDTA in PBS) for 15 min at  $37^\circ\text{C}$ . Then, several cytospins were prepared on glass slides for immunofluorescence staining of Arg-1 (M2 macrophage marker) and Biotin-tagged GSL (goat anti-griffonia simplicifolia lectin 1). An Alexa Fluor 488 conjugated Arginase-1 antibody (Cell Signaling, catalog #: 66297) was used at 1:200 dilution, and GSL (Vector Laboratories, B-1205-.5) was added at 1:50 dilution. For the detection of GSL, Cy5 streptavidin (Vector Laboratories, SA-1500-1) was used at 1:500 dilution. Quantification of Arg-1 immunofluorescence signal was performed as described in Methods section.

#### Supplementary Figure 3A

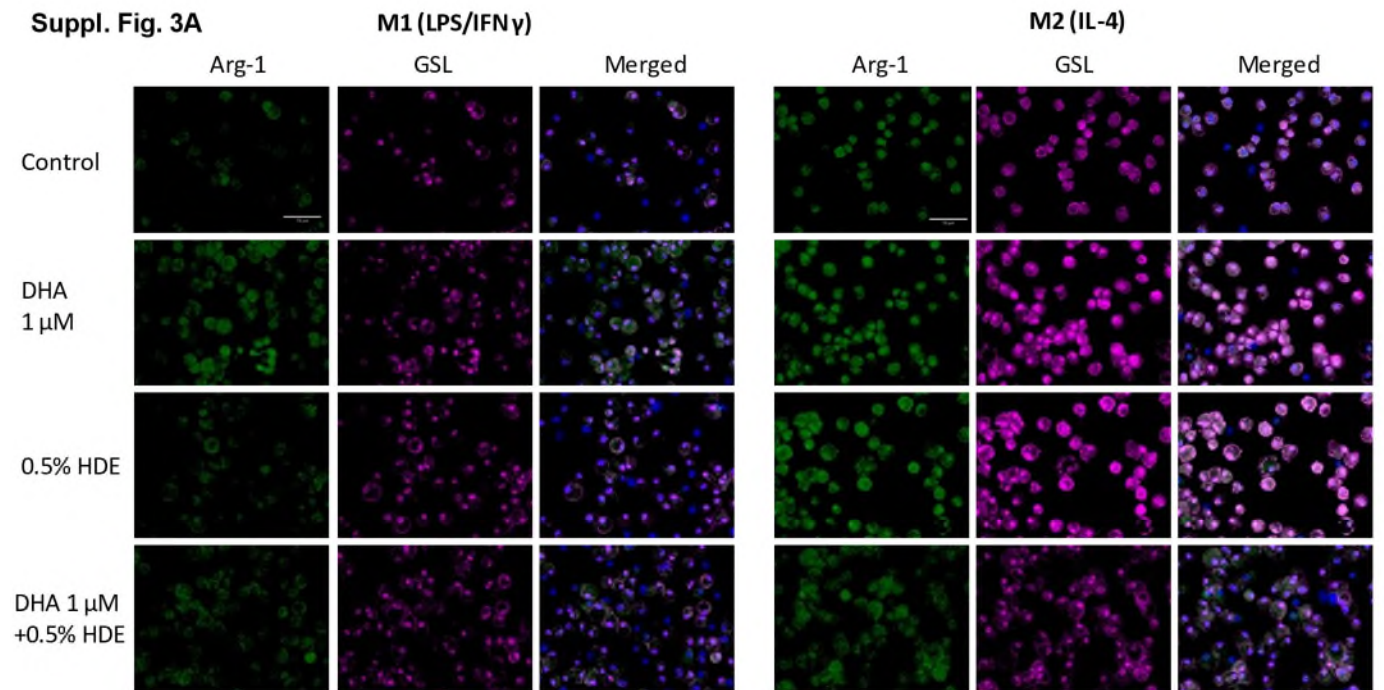

Primary BMDM were differentiated with L929 medium for 7 days, then stimulated with LPS/IFN $\gamma$  (50 ng/ml/ 20 ng/ml) or IL-4 (20 ng/ml) for 24 hours.

### Supplementary Figure 3B

**Suppl. Fig. 3.** Effects of DHA and HDE on M1/M2 polarization of bone marrow derived macrophages at 72 hours (B).

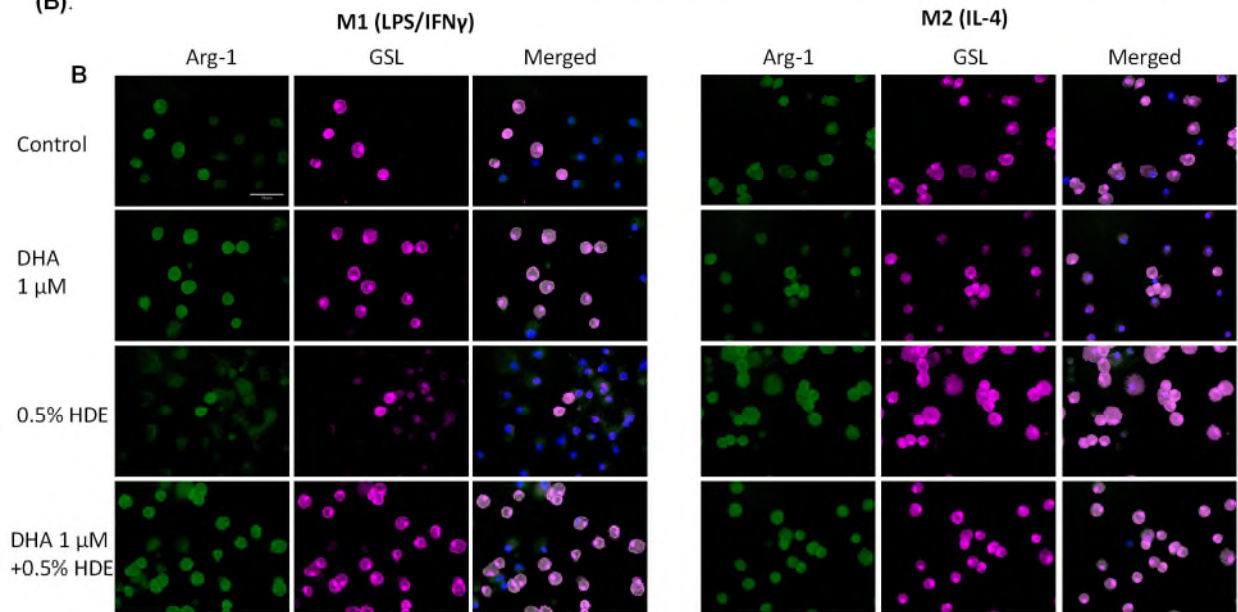

Primary BMDM were differentiated with L929 medium for 7 days, then stimulated with LPS/IFN $\gamma$  (50 ng/ml/ 20 ng/ml) or IL-4 (20 ng/ml) for 72 hours.

### Supplementary Figure 3C-F

**Suppl. Fig. 3.** Effects of DHA and HDE on M1/M2 polarization of bone marrow derived macrophages. Quantification of Arg-1 immunofluorescence signal for each time point are shown on C (M1-24 hour), D (M2-24 hour), E (M1-72 hour) and F (M2-72 hour).

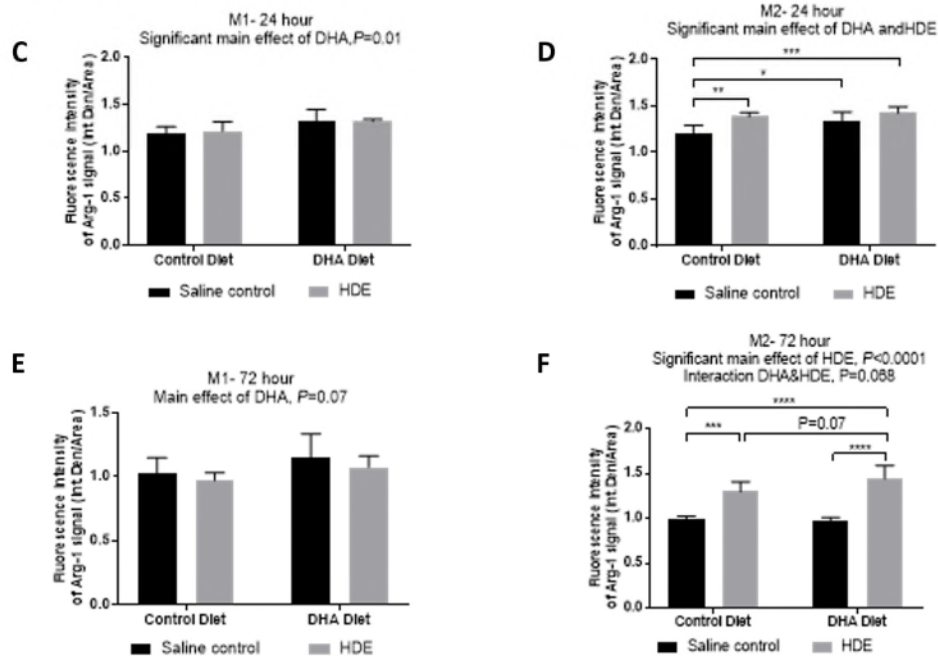

## 2) Supplementary Tables

**Table S1** Comparison of AIN-93G, Envigo control and DHA diets.

| g/kg diet          |            |                             |           |                                    |           |
|--------------------|------------|-----------------------------|-----------|------------------------------------|-----------|
|                    | AIN-93G[1] | Envigo Control diet         |           | Envigo DHA diet                    |           |
| Casein             | 200        | Casein                      | 200       | Casein                             | 200       |
| L-cysteine         | 3          | L-cysteine                  | 3         | L-cysteine                         | 3         |
| Cornstarch         | 397.486    | Cornstarch                  | 397.38    | Cornstarch                         | 397.38    |
| Maltodextrin       | 132        | Maltodextrin                | 132       | Maltodextrin                       | 132       |
| Sucrose            | 100        | Sucrose                     | 100       | Sucrose                            | 100       |
| Fiber              | 50         | Cellulose                   | 50        | Cellulose                          | 50        |
| <b>Soybean oil</b> | <b>70</b>  | <b>Safflower oil, oleic</b> | <b>70</b> | <b>Safflower oil, oleic</b>        | <b>55</b> |
| --                 |            | --                          |           | <b>DHA oil (DHASCO, 39.2% DHA)</b> | <b>15</b> |
| Choline bitartrate | 2.5        | Choline bitartrate          | 2.5       | Choline bitartrate                 | 2.5       |
| Mineral mix        | 35         | Mineral mix                 | 35        | Mineral mix                        | 35        |
| Vitamin mix        | 10         | Vitamin mix                 | 10        | Vitamin mix                        | 10        |
| TBHQ               | 0.014      | TBHQ                        | 0.02      | TBHQ                               | 0.02      |

This modification of AIN-93G replaces soybean oil with DHASCO DHA Oil (39.2% DHA) and safflower oil. Calculated for 5.88g DHA/kg provide approximately 1.4% of kcal. Please see the certificate of analysis of the DHASCO DHA oil as well as the Envigo data sheets for the control and DHA diets below.

## References

1. Reeves PG: **Components of the AIN-93 diets as improvements in the AIN-76A diet.** *J Nutr* 1997, **127**:838S-841S.

**Table S2** Fatty Acid Analysis in whole blood after control or high DHA diet feeding.

|          |                                                 | Weight to weight (%) |                             |                |                 |                |              |                   |             |             |               |             |        |        |               |             |         |         |
|----------|-------------------------------------------------|----------------------|-----------------------------|----------------|-----------------|----------------|--------------|-------------------|-------------|-------------|---------------|-------------|--------|--------|---------------|-------------|---------|---------|
| Duration | Diet (control or DHA)/ Exposure (saline or HDE) |                      | Monounsaturated Fatty Acids |                |                 |                |              |                   |             |             |               |             |        |        | Omega-6 PUFAs |             |         |         |
|          |                                                 |                      | Saturated Fatty Acids       |                |                 |                | Fatty Acids  |                   |             |             | Omega-3 PUFAs |             |        |        | c18:2n6 LA    | c20:4n6 ARA | c22:4n6 | c22:5n6 |
|          |                                                 |                      | c12:0 Lauric                | c14:0 Myristic | c16:0 Palmitate | c18:0 Stearate | c18:1 Oleate | c16:1 Palmitoleic | c18:3n3 ALA | c20:5n3 EPA | c22:6n3 DHA   | c22:5n3 DPA |        |        |               |             |         |         |
| 3-week   | Control                                         | <b>AVG</b>           | 0.23%                       | 0.29%          | 30.41%          | 12.73%         | 18.94%       | 1.51%             | 0.56%       | 0.77%       | 1.70%         | 0.14%       | 10.21% | 9.21%  | 0.35%         | 0.63%       |         |         |
|          | Saline                                          | <b>SEM</b>           | 0.03%                       | 0.02%          | 1.47%           | 0.62%          | 1.54%        | 0.14%             | 0.07%       | 0.12%       | 0.30%         | 0.03%       | 1.05%  | 1.12%  | 0.10%         | 0.15%       |         |         |
| 3-week   | Control HDE                                     | <b>AVG</b>           | 0.22%                       | 0.30%          | 31.24%          | 12.56%         | 17.77%       | 1.57%             | 0.45%       | 0.61%       | 1.74%         | 0.16%       | 11.36% | 8.51%  | 0.32%         | 0.53%       |         |         |
|          |                                                 | <b>SEM</b>           | 0.02%                       | 0.02%          | 0.98%           | 0.35%          | 1.22%        | 0.14%             | 0.06%       | 0.11%       | 0.23%         | 0.03%       | 0.94%  | 0.69%  | 0.06%         | 0.09%       |         |         |
| 3-week   | DHA saline                                      | <b>AVG</b>           | 0.28%                       | 0.46%          | 35.90%          | 11.16%         | 20.77%       | 1.53%             | 0.40%       | 1.63%       | 6.09%         | 0.21%       | 9.29%  | 1.58%  | 0.03%         | 0.04%       |         |         |
|          |                                                 | <b>SEM</b>           | 0.04%                       | 0.03%          | 1.03%           | 0.44%          | 0.39%        | 0.12%             | 0.04%       | 0.30%       | 0.62%         | 0.03%       | 0.69%  | 0.18%  | 0.01%         | 0.01%       |         |         |
| 3-week   | DHA + HDE                                       | <b>AVG</b>           | 0.31%                       | 0.51%          | 35.19%          | 10.57%         | 21.22%       | 1.62%             | 0.36%       | 1.92%       | 6.53%         | 0.26%       | 9.23%  | 1.99%  | 0.04%         | 0.06%       |         |         |
|          |                                                 | <b>SEM</b>           | 0.03%                       | 0.03%          | 1.44%           | 0.40%          | 0.36%        | 0.09%             | 0.05%       | 0.29%       | 0.98%         | 0.04%       | 0.54%  | 0.34%  | 0.01%         | 0.01%       |         |         |
| Recovery | Control                                         | <b>AVG</b>           | 0.20%                       | 0.26%          | 26.56%          | 11.08%         | 20.61%       | 1.60%             | 0.66%       | 0.71%       | 1.66%         | 0.12%       | 12.12% | 10.41% | 0.52%         | 0.94%       |         |         |
|          | Saline                                          | <b>SEM</b>           | 0.02%                       | 0.02%          | 1.41%           | 0.53%          | 1.92%        | 0.08%             | 0.07%       | 0.12%       | 0.28%         | 0.05%       | 1.24%  | 1.26%  | 0.13%         | 0.23%       |         |         |
| Recovery | Control HDE                                     | <b>AVG</b>           | 0.23%                       | 0.30%          | 31.11%          | 12.86%         | 20.31%       | 1.56%             | 0.42%       | 0.45%       | 1.26%         | 0.10%       | 10.34% | 7.51%  | 0.28%         | 0.58%       |         |         |
|          |                                                 | <b>SEM</b>           | 0.01%                       | 0.01%          | 0.85%           | 0.38%          | 1.25%        | 0.10%             | 0.06%       | 0.11%       | 0.22%         | 0.03%       | 0.98%  | 0.64%  | 0.04%         | 0.09%       |         |         |
| Recovery | DHA saline                                      | <b>AVG</b>           | 0.34%                       | 0.50%          | 40.55%          | 11.25%         | 20.86%       | 1.64%             | 0.06%       | 1.32%       | 4.57%         | 0.15%       | 7.73%  | 1.00%  | 0.04%         | 0.04%       |         |         |
|          |                                                 | <b>SEM</b>           | 0.06%                       | 0.06%          | 0.32%           | 0.30%          | 0.71%        | 0.10%             | 0.04%       | 0.02%       | 0.24%         | 0.01%       | 0.05%  | 0.01%  | 0.00%         | 0.01%       |         |         |
| Recovery | DHA + HDE                                       | <b>AVG</b>           | 0.25%                       | 0.42%          | 34.34%          | 9.77%          | 21.02%       | 1.45%             | 0.31%       | 2.70%       | 7.45%         | 0.29%       | 9.93%  | 2.20%  | 0.04%         | 0.08%       |         |         |
|          |                                                 | <b>SEM</b>           | 0.02%                       | 0.02%          | 1.72%           | 0.23%          | 0.35%        | 0.10%             | 0.07%       | 0.42%       | 1.19%         | 0.05%       | 0.57%  | 0.30%  | 0.01%         | 0.01%       |         |         |



**Table S3** Changes in omega-6-to-omega-3 ratio following control versus high DHA dietary supplementation.

| <b>Duration</b>   | <b>Diet (control or DHA)/<br/>Exposure (saline or HDE)</b> | <b>Omega-6/omega-3</b> |
|-------------------|------------------------------------------------------------|------------------------|
| <b>3-week*</b>    | Control Saline                                             | 7.1 ± 0.9              |
| 3-week            | Control HDE                                                | 8.4 ± 0.9              |
| 3-week            | DHA saline                                                 | 1.3 ± 0.1              |
| 3-week            | DHA + HDE                                                  | 1.4 ± 0.1              |
| <b>Recovery**</b> | Control Saline                                             | 9.5 ± 1.2              |
| Recovery          | Control HDE                                                | 10.6 ± 1.0             |
| Recovery          | DHA saline                                                 | 1.1 ± 0.1              |
| Recovery          | DHA + HDE                                                  | 1.3 ± 0.1              |

\*The overall  $\Sigma$ omega-6 PUFA :  $\Sigma$ omega-3 PUFA is 7.9:1 and 1.4:1 for control and DHA diets, respectively in the 3-week period.

\*\* The overall  $\Sigma$ omega-6 PUFA :  $\Sigma$ omega-3 PUFA is 10.2:1 and 1.3:1 for control and DHA diets, respectively in the recovery period.

**3) Certificate of analysis for DHASCO showing fatty acid analysis.**

**Attached as PDF.**

**4) Data sheets for Envigo control and high DHA diet showing detailed fatty acid analysis.**

**Attached as PDF.**

Product code : 5013658005

Lot No. : VY00089110

Analysis No. : 77006464

| Test                            | Result      | Limits / Specifications                    | Dimension / Units |
|---------------------------------|-------------|--------------------------------------------|-------------------|
| <b>APPEARANCE</b>               | Corresponds | CLEAR FREE FLOWING LIQUID AT 40°C          |                   |
| <b>COLOR</b>                    | Corresponds | LIGHT YELLOW TO DARK ORANGE CHARACTERISTIC |                   |
| <b>AROMA</b>                    | Corresponds |                                            |                   |
| <b>DOCOSAHEXAENOIC ACID</b>     | 396         | 380 – 420                                  | mg/g              |
| <b>DOCOSAHEXAENOIC ACID</b>     | 43.7        | 40.0 – 45.0                                | %                 |
| <b>PEROXIDE VALUE</b>           | < 0.1       | Max. 5.0                                   | meq/kg            |
| <b>ANISIDINE VALUE</b>          | 18          | Max. 20                                    |                   |
| <b>FREE FATTY ACID</b>          | 0.1         | Max. 0.4                                   | %                 |
| <b>UNSATURATED MATTER</b>       | 1.9         | Max. 3.5                                   | %                 |
| <b>INSOLUBLE IMPURITIES</b>     | < 0.01      | Max. 0.1                                   | %                 |
| <b>MOISTURE &amp; VOLATILES</b> | < 0.01      | Max. 0.1                                   | %                 |
| <b>TRANS FATTY ACIDS</b>        | < 1         | Max. 1                                     | %                 |
| <b>ELEMENTAL COMPOSITION</b>    |             |                                            |                   |
| Arsenic                         | < 0.1       | Max. 0.1                                   | ppm               |
| Cadmium                         | < 0.1       | Max. 0.1                                   | ppm               |
| Chromium                        | < 0.1       | Max. 0.2                                   | ppm               |
| Copper                          | < 0.02      | Max. 0.1                                   | ppm               |
| Iron                            | < 0.02      | Max. 0.2                                   | ppm               |
| Lead                            | < 0.1       | Max. 0.1                                   | ppm               |
| Manganese                       | < 0.01      | Max. 0.04                                  | ppm               |
| Mercury                         | < 0.01      | Max. 0.04                                  | ppm               |
| Molybdenum                      | < 0.05      | Max. 0.2                                   | ppm               |
| Nickel                          | < 0.1       | Max. 0.2                                   | ppm               |
| Phosphorus                      | < 1         | Max. 10                                    | ppm               |
| Silicon                         | 4           | Max. 500                                   | ppm               |
| Sulfur                          | 11          | Max. 100                                   | ppm               |
| <b>FATTY ACID PROFILE</b>       |             |                                            |                   |
| 8:0                             | 0.4         |                                            | %                 |
| 9:0                             | < 0.1       |                                            | %                 |
| 10:0                            | 1.3         | Max. 5.0                                   | %                 |
| 11:0                            | < 0.1       |                                            | %                 |
| 12:0                            | 5.6         | Max. 15.0                                  | %                 |
| 13:0                            | 0.1         |                                            | %                 |
| 14:0                            | 13.6        | Max. 25.0                                  | %                 |
| 14:1                            | 0.3         |                                            | %                 |
| 16:0                            | 11.6        | Max. 20.0                                  | %                 |
| 16:1                            | 2.8         | Max. 10.0                                  | %                 |

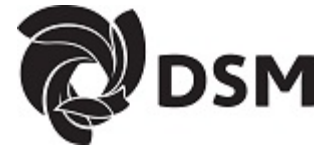

Product code : 5013658005  
 Lot No. : VY00089110  
 Analysis No. : 77006464

| Test        | Result | Limits / Specifications | Dimension / Units |
|-------------|--------|-------------------------|-------------------|
| 17:0        | < 0.1  |                         | %                 |
| 17:1        | < 0.1  |                         | %                 |
| 18:0        | 0.7    | Max. 5.0                | %                 |
| 18:1n-9     | 18.4   | Max. 40.0               | %                 |
| 18:1n-7     | < 0.1  |                         | %                 |
| 18:2n-6     | 0.9    | Max. 5.0                | %                 |
| 18:3n-3     | < 0.1  |                         | %                 |
| 20:0        | < 0.1  |                         | %                 |
| 20:1n-9     | < 0.1  |                         | %                 |
| 20:2n-6     | < 0.1  |                         | %                 |
| 20:3n-6     | < 0.1  |                         | %                 |
| 20:4n-6     | < 0.1  |                         | %                 |
| 20:5n-3 EPA | < 0.1  | Max. 0.1                | %                 |
| 22:0        | < 0.1  |                         | %                 |
| 22:5n-3     | < 0.1  |                         | %                 |
| 22:6n-3 DHA | 43.7   | 40.0 – 45.0             | %                 |
| 24:0        | < 0.1  |                         | %                 |
| 24:1        | < 0.1  | Max. 5.0                | %                 |
| Others      | < 0.1  | Max. 5.0                | %                 |

DSM endorses that this product meets the listed specifications through the 'best use before' date when the material is stored at the recommended temperature in the original, unopened container. Beyond the 'best use before' date, we recommend the quality of the product be confirmed by retesting the Certificate of Analysis parameters.

For questions regarding this Certificate of Analysis, please contact Customer Service.  
 Toll free (US Only) 1-800-662-6339 • International +1 (410) 740-0081

Released By:

Ken Janes - Sr. Manager, Quality

## Formula

g/Kg

|                                 |        |
|---------------------------------|--------|
| Casein                          | 200.0  |
| L-Cystine                       | 3.0    |
| Corn Starch                     | 397.38 |
| Maltodextrin                    | 132.0  |
| Sucrose                         | 100.0  |
| Cellulose                       | 50.0   |
| Safflower Oil, oleic            | 70.0   |
| Mineral Mix, AIN-93G-MX (94046) | 35.0   |
| Vitamin Mix, AIN-93-VX (94047)  | 10.0   |
| Choline Bitartrate              | 2.5    |
| TBHQ, antioxidant               | 0.02   |
| Blue Food Color                 | 0.1    |

## Footnote

This modification of AIN-93G replaces soybean oil high oleic safflower oil. Diet is color coded blue. Control diet for TD.160632.

Selected Nutrient Information<sup>1</sup>

|              | % by weight | % kcal from |
|--------------|-------------|-------------|
| Protein      | 17.7        | 18.8        |
| Carbohydrate | 60.1        | 63.9        |
| Fat          | 7.2         | 17.2        |
| Kcal/g       | 3.8         |             |

<sup>1</sup> Values are calculated from ingredient analysis or manufacturer data

## Speak With A Nutritionist

- + (800) 483-5523
- + [askanutritionist@envigo.com](mailto:askanutritionist@envigo.com)

Teklad diets are designed & manufactured for research purposes only.

## Key Features

- + Purified Diet
- + AIN-93G Modification
- + Oleic Safflower Oil
- + Color Coded Blue

## Key Planning Information

- + Products are made fresh to order
- + Store product at 4°C or lower
- + Use within 6 months (applicable to most diets)
- + Box labeled with product name, manufacturing date, and lot number
- + Replace diet at minimum once per week
  - More frequent replacement may be advised*
- + Lead time:
  - 2 weeks non-irradiated
  - 4 weeks irradiated

## Product Specific Information

- + 1/2" Pellet or Powder (free flowing)
- + Minimum order 3 Kg
- + Irradiation not advised
  - Contact a nutritionist for recommendations

## Options (fees will apply)

- + Rush order (pending availability)
- + Irradiation (see Product Specific Information)
- + Vacuum packaging (1 and 2 Kg)

## Contact Us

Obtain pricing · Check order status

- + [teklad@envigo.com](mailto:teklad@envigo.com)
- + (800) 483-5523

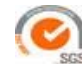

## International Inquiry (outside USA or Canada)

- + [askanutritionist@envigo.com](mailto:askanutritionist@envigo.com)

## Place Your Order (USA &amp; Canada)

Please Choose One

- + [www.envigo.com/teklad-orders](http://www.envigo.com/teklad-orders)
- + [tekladorders@envigo.com](mailto:tekladorders@envigo.com)
- + (800) 483-5523
- + (608) 277-2066 *facsimile*

## Formula

g/Kg

|                                                |        |
|------------------------------------------------|--------|
| Casein                                         | 200.0  |
| L-Cystine                                      | 3.0    |
| Corn Starch                                    | 397.38 |
| Maltodextrin                                   | 132.0  |
| Sucrose                                        | 100.0  |
| Cellulose                                      | 50.0   |
| DHA Oil (DHASCO, 39.2% DHA), customer supplied | 15.0   |
| Safflower Oil, oleic                           | 55.0   |
| Mineral Mix, AIN-93G-MX (94046)                | 35.0   |
| Vitamin Mix, AIN-93-VX (94047)                 | 10.0   |
| Choline Bitartrate                             | 2.5    |
| TBHQ, antioxidant                              | 0.02   |
| Red Food Color                                 | 0.1    |

## Footnote

This modification of AIN-93G replaces soybean oil with DHASCO DHA Oil (39.2% DHA) and safflower oil. Calculated for 5.88g DHA/kg to provide approximately 1.4% of kcal. Diet is color coded red.

Selected Nutrient Information<sup>1</sup>

|               | % by weight | % kcal from |
|---------------|-------------|-------------|
| Protein       | 17.7        | 18.8        |
| Carbohydrate  | 60.1        | 63.9        |
| Fat           | 7.2         | 17.2        |
| <b>Kcal/g</b> | <b>3.8</b>  |             |

<sup>1</sup> Values are calculated from ingredient analysis or manufacturer data

## Speak With A Nutritionist

- + (800) 483-5523
- + [askanutritionist@envigo.com](mailto:askanutritionist@envigo.com)

Teklad diets are designed & manufactured for research purposes only.

## Key Features

- + Purified Diet
- + AIN-93G Modification
- + DHA Oil
- + Color Coded Red

## Key Planning Information

- + Products are made fresh to order
- + Store product at 4°C or lower
- + Use within 6 months (applicable to most diets)
- + Box labeled with product name, manufacturing date, and lot number
- + Replace diet at minimum once per week
  - More frequent replacement may be advised*
- + Lead time:
  - 2 weeks non-irradiated
  - 4 weeks irradiated

## Product Specific Information

- + 1/2" Pellet or Powder (free flowing)
- + Minimum order 3 Kg
- + Irradiation not advised
  - Contact a nutritionist for recommendations

## Options (fees will apply)

- + Rush order (pending availability)
- + Irradiation (see Product Specific Information)
- + Vacuum packaging (1 and 2 Kg)

## Contact Us

Obtain pricing · Check order status

- + [teklad@envigo.com](mailto:teklad@envigo.com)
- + (800) 483-5523



## International Inquiry (outside USA or Canada)

- + [askanutritionist@envigo.com](mailto:askanutritionist@envigo.com)

## Place Your Order (USA &amp; Canada)

Please Choose One

- + [www.envigo.com/teklad-orders](http://www.envigo.com/teklad-orders)
- + [tekladorders@envigo.com](mailto:tekladorders@envigo.com)
- + (800) 483-5523
- + (608) 277-2066 *facsimile*
